# Supplementary material for: Depth-Dependent Genetic Structuring of a Depth-Generalist Coral and Its Symbiodiniaceae Algal Communities at Campeche Bank, Mexico
Source: Frontiers journal article supplement (doi:10.3389/fmars.2022.835789), 2022-05-17
Supplement: Data_Sheet_1.pdf [file Data_Sheet_1.pdf]

## Supplementary Tables

### Supplementary Table S1

A list of geographic coordinates for all the sampling sites and which depth zones were targeted at each site; the number of samples collected at each depth zone from each site; the number of samples with successfully sequenced *ITS2* libraries that were included in the Symbiodiniaceae community analysis; the number of samples with successfully sequenced 2bRAD libraries; and the number of samples that were identified as unique multilocus genotypes (i.e. clones removed,  $n_g$ ) that were retained in the coral host population genetics analysis.

| Reef Populations       | Latitude | Longitude | Samples Collected | <i>ITS2</i> Sequenced | 2bRAD Sequenced | $n_g$ |
|------------------------|----------|-----------|-------------------|-----------------------|-----------------|-------|
| <b>Alacranes</b>       |          |           |                   |                       |                 |       |
| 10 m                   | 22.3962  | -89.7058  | 5                 | 5                     | 4               | 4     |
|                        | 22.5113  | -89.7974  | 5                 | 5                     | 5               | 5     |
|                        | 22.5458  | -89.6601  | 8                 | 8                     | 7               | 7     |
| 15 m                   | 22.3962  | -89.7058  | 3                 | 3                     | 3               | 3     |
|                        | 22.5113  | -89.7974  | 5                 | 5                     | 4               | 4     |
|                        | 22.5458  | -89.6601  | 8                 | 8                     | 4               | 4     |
| 25 m                   | 22.3962  | -89.7058  | 7                 | 7                     | 6               | 6     |
|                        | 22.5093  | -89.62780 | 3                 | 3                     | 3               | 3     |
|                        | 22.5867  | -89.7521  | 6                 | 6                     | 6               | 6     |
| 35 m                   | 22.3959  | -89.7056  | 9                 | 9                     | 8               | 8     |
|                        | 22.5867  | -89.7521  | 7                 | 7                     | 7               | 7     |
| <b>Bajos del Norte</b> |          |           |                   |                       |                 |       |
| 10 m                   | 23.2474  | -88.7078  | 15                | 15                    | 10              | 10    |
| 15 m                   | 23.2474  | -88.7078  | 15                | 15                    | 12              | 12    |
| 25 m                   | 23.2837  | -88.7116  | 19                | 18                    | 8               | 7     |
| 35 m                   | 23.3071  | -88.7162  | 11                | 10                    | 11              | 11    |

**Supplementary Table S2**

Mean heterozygosity calculated for each sample population across all sites (variant and invariant) and across variant sites (SNP loci) only.  $n_g$  indicates the number of unique genotypic individuals within each sample population

| <b>Reef</b>     | <b>Depth Zone<br/>(m)</b> | <b><math>H_o</math> (Variant and<br/>Invariant Sites)</b> | <b><math>H_o</math><br/>(Variant Sites Only)</b> | <b><math>n_g</math></b> |
|-----------------|---------------------------|-----------------------------------------------------------|--------------------------------------------------|-------------------------|
| Alacranes       | 10                        | 0.0030                                                    | 0.2599                                           | 16                      |
|                 | 15                        | 0.0028                                                    | 0.2500                                           | 11                      |
|                 | 25                        | 0.0029                                                    | 0.2548                                           | 15                      |
|                 | 35                        | 0.0030                                                    | 0.2566                                           | 15                      |
| Bajos del Norte | 10                        | 0.0032                                                    | 0.2759                                           | 10                      |
|                 | 15                        | 0.0030                                                    | 0.2701                                           | 12                      |
|                 | 25                        | 0.0031                                                    | 0.2696                                           | 7                       |
|                 | 35                        | 0.0030                                                    | 0.2647                                           | 11                      |

**Supplementary Table S3**

List of outlier SNP loci identified by BAYESCAN within  $\pm 2$  kb of *Montastraea cavernosa* annotated gene regions. The Clusters of Orthologous Groups (COG) functional category notations are as follows: **A** RNA processing and modification; **B** chromatin structure and dynamics; **C** energy production and conversion; **D** cell cycle control and mitosis; **E** amino acid metabolism and transport; **F** nucleotide metabolism and transport; **G** carbohydrate metabolism and transport; **H** coenzyme metabolism; **I** lipid metabolism; **J** translation; **K** transcription; **L** replication and repair; **M** cell wall/membrane/envelop biogenesis; **N** cell motility; **O** post-translational modification, protein turnover, chaperone functions; **P** inorganic ion transport and metabolism; **Q** secondary structure; **T** signal transduction; **U** intracellular trafficking and secretion; **Y** nuclear structure; **Z** cytoskeleton; **R** general functional prediction only; **S** function unknown. Significance level is indicated by the number of asterisks, \* <0.1, \*\* <0.05, \*\*\* <0.01.

| Locus | Gene ID         | COG Functional Category | Gene Annotation                                                                                    | Significance Level |
|-------|-----------------|-------------------------|----------------------------------------------------------------------------------------------------|--------------------|
| 2390  | Mcavernosa02795 | K                       | Cell division cycle 73, Paf1 RNA polymerase II complex component, homolog ( <i>S. cerevisiae</i> ) | *                  |
| 2802  | Mcavernosa04395 | S                       | Coiled-coil domain containing 6                                                                    | ***                |
| 3780  | Mcavernosa13861 | G                       | Solute carrier family 16, member                                                                   | *                  |
| 3818  | Mcavernosa13785 | T                       | Receptor                                                                                           | **                 |
| 6256  | Mcavernosa15490 | T, Z                    | Dishevelled Associated Activator of Morphogenesis                                                  | *                  |
| 7435  | Mcavernosa20088 | K                       | Zinc finger CCCH-type containing                                                                   | *                  |
| 7801  | Mcavernosa17690 | I                       | Phospholipase C                                                                                    | ***                |
| 9798  | Mcavernosa12028 | S                       | Responsible for the deiodination of T4 (3,5,3,5- tetraiodothyronine, by similarity)                | **                 |

**Supplementary Table S4**

Results from pairwise permutational multivariate analysis of variance (PERMANOVA; 9,999 permutations) of Symbiodiniaceae communities based on *ITS2* type profile composition between all depth zones with significant comparisons bolded (FDR-corrected *p*-values).

| <b>Depth Zone Comparison</b> | <b>Pseudo-<i>F</i></b> | <b><i>p</i>-value</b> |
|------------------------------|------------------------|-----------------------|
| 10 m vs. 15 m                | 1.107                  | 0.3450                |
| 10 m vs. 25 m                | 9.163                  | <b>0.0001</b>         |
| 10 m vs. 35 m                | 6.901                  | <b>0.0001</b>         |
| 15 m vs. 25 m                | 5.707                  | <b>0.0001</b>         |
| 15 m vs. 25 m                | 4.853                  | <b>0.0001</b>         |
| 25 m vs. 35 m                | 2.343                  | <b>0.0403</b>         |
